# Supplementary material
Source: HighWire-hosted journal article supplement (http://dmd.aspetjournals.org/highwire/filestream/66369/field_highwire_adjunct_files/0/Supplemental_Table_1_55194.pdf)
Supplement: Supplemental_Table_1_55194.pdf [file Supplemental_Table_1_55194.pdf]

## Title

# Aspirin and probenecid inhibit OAT3-mediated renal uptake of cilostazol and probenecid induces metabolism of cilostazol in rat

Chong Wang, Changyuan Wang, Qi Liu, Qiang Meng, Jian Cang, Huijun Sun,

Jinyong Peng, Xiaochi Ma, Xiaokui Huo and Kexin Liu

## Drug metabolism and disposition

## Appendix

**Detailed Pharmacokinetic parameters of cilostazol after p.o. administration in rats when administered alone or in combination with aspirin or probenecid.**

## Table Legent

**Supplemental Table 1.** Pharmacokinetic parameters of cilostazol (30 mg/kg) after p.o. administration in rats when administered alone or in combination with aspirin (10mg/kg) or probenecid (30 mg/kg)

| Parameters                                                                                             | Cilostazol        | Cilostazol+Aspirin              | Cilostazol+Probenecid          |
|--------------------------------------------------------------------------------------------------------|-------------------|---------------------------------|--------------------------------|
| <i>C<sub>max</sub></i> ( $\mu\text{g/ml}$ )                                                            | 3.16 $\pm$ 0.46   | 3.56 $\pm$ 0.12                 | 2.48 $\pm$ 0.27 <sup>b</sup>   |
| <i>AUC</i> <sub>0<math>\rightarrow</math><math>\infty</math></sub> ( $\mu\text{g}\cdot\text{min/ml}$ ) | 580.08 $\pm$ 0.75 | 1185.30 $\pm$ 0.12 <sup>a</sup> | 255.00 $\pm$ 0.31 <sup>a</sup> |
| p.o. <i>T<sub>max</sub></i> (h)                                                                        | 0.73 $\pm$ 0.02   | 0.81 $\pm$ 0.04                 | 0.48 $\pm$ 0.06 <sup>b</sup>   |
| <i>t</i> <sub>1/2<math>\beta</math></sub> (h)                                                          | 3.43 $\pm$ 0.07   | 4.09 $\pm$ 0.03 <sup>b</sup>    | 5.74 $\pm$ 0.05 <sup>b</sup>   |

<sup>a</sup> Statistically significant difference:  $p < 0.01$ .

<sup>b</sup> Statistically significant difference:  $p < 0.05$ .
